# Supplementary material for: COVID-19 in Elderly Patients Surgically Treated for Lower Limbs Fracture
Source: MDPI journal article supplement (doi:10.3390/jcm11010168), 2021-12-29
Supplement: s1 [file s1]

**Supplementary table S1.** Clinical data of the patients.

| Case | Age | Sex | Medical History                                                                          | COVID-19 | Orthopedic diagnosis              | Blood transfusions | Pharmacological treatments                     | Complications          |
|------|-----|-----|------------------------------------------------------------------------------------------|----------|-----------------------------------|--------------------|------------------------------------------------|------------------------|
| N°1  | 89  | F   | Obesity, hypertension                                                                    | Yes      | Per-trochanteric femoral fracture | day 2 post-surgery | LMWH, antibiotic prophylaxis, NSAIDS, steroids | none                   |
| N°2  | 81  | F   | Hypothyroidism                                                                           | Yes      | Per-trochanteric femoral fracture | No                 | LMWH, antibiotic prophylaxis, NSAIDS, steroids | none                   |
| N°3  | 85  | F   | Anemia, hypertension, arrhythmias, COPD, rheumatoid arthritis, nephropathy, osteoporosis | Yes      | Femoral fracture                  | day 1 post-surgery | LMWH, antibiotic prophylaxis, NSAIDS           | none                   |
| N°4  | 68  | F   | Hypertension                                                                             | Yes      | Tibia and fibula fracture         | No                 | LMWH, antibiotic prophylaxis, NSAIDS           | none                   |
| N°5  | 73  | M   | /                                                                                        | Yes      | Femoral neck fracture             | No                 | LMWH, antibiotic prophylaxis, NSAIDS           | CPAP, ICU post-surgery |
| N°6  | 79  | M   | Benign prostatic hyperplasia                                                             | Yes      | Femoral neck fracture             | No                 | LMWH, antibiotic prophylaxis, NSAIDS           | none                   |
| N°7  | 80  | F   | /                                                                                        | Yes      | Femoral neck fracture             | No                 | LMWH, antibiotic prophylaxis, NSAIDS           | none                   |
| N°8  | 87  | M   | Hypertension, arrhythmias                                                                | Yes      | Femoral neck fracture             | No                 | LMWH, antibiotic prophylaxis, NSAIDS           | none                   |
| N°9  | 77  | F   | Diabetes, dementia, Parkinson's disease                                                  | Yes      | Femoral neck fracture             | day 2 post-surgery | LMWH, antibiotic prophylaxis, NSAIDS           | none                   |
| N°10 | 78  | F   | Chronic kidney disease                                                                   | Yes      | Femoral neck fracture             | day 1 post-surgery | LMWH, antibiotic prophylaxis, NSAIDS, steroids | ICU post-surgery       |
| N°11 | 60  | F   | Hypertension, osteoporosis                                                               | Yes      | Femoral fracture                  | day 2 post-surgery | LMWH, antibiotic prophylaxis, NSAIDS           | none                   |
| N°12 | 88  | F   | Dementia, hypertension, arrhythmias, osteoporosis                                        | Yes      | Femoral fracture                  | day 2 pre-surgery  | LMWH, antibiotic prophylaxis, NSAIDS, steroids | ICU, Death             |
| N°13 | 89  | F   | Diabetes, hypertension                                                                   | Yes      | Per-trochanteric femoral fracture | day 2 pre-surgery  | LMWH, antibiotic prophylaxis, NSAIDS           | none                   |
| N°14 | 72  | M   | Obesity, hypertension, COPD, heart disease, diabetes                                     | No       | Femoral neck fracture             | No                 | LMWH, antibiotic prophylaxis, NSAIDS           | none                   |
| N°15 | 92  | F   | Alzheimer's disease                                                                      | No       | Femoral neck fracture             | day of surgery     | LMWH, antibiotic prophylaxis, NSAIDS           | none                   |
| N°16 | 90  | M   | Heart disease                                                                            | No       | Femoral fracture                  | day 2 post-surgery | LMWH, antibiotic prophylaxis, NSAIDS           | Hematoma post-surgery  |
| N°17 | 73  | F   | Hypertension, heart disease                                                              | No       | Femoral neck fracture             | No                 | LMWH, antibiotic prophylaxis, NSAIDS           | none                   |
| N°18 | 79  | F   | Hypertension                                                                             | No       | Femoral neck fracture             | day 2 post-surgery | LMWH, antibiotic prophylaxis, NSAIDS           | none                   |
| N°19 | 79  | F   | Diabetes, hypertension, arrhythmias                                                      | No       | Femoral neck fracture             | day 2 post-surgery | LMWH, antibiotic prophylaxis, NSAIDS           | none                   |
| N°20 | 73  | M   | Diabetes, hemiplegia, cerebrovascular diseases                                           | No       | Femoral neck fracture             | day 3 post-surgery | LMWH, antibiotic prophylaxis, NSAIDS           | none                   |
| N°21 | 89  | F   | Diabetes, hypertension                                                                   | No       | Femoral neck fracture             | No                 | LMWH, antibiotic prophylaxis, NSAIDS           | none                   |
| N°22 | 85  | F   | Hypertension, dyslipidemia                                                               | No       | Hip peri-                         | day 3 post-        | LMWH, antibiotic                               | none                   |

|      |    |   |                                               | prosthetic fracture | surgery                           | prophylaxis, NSAIDS |                                      |      |
|------|----|---|-----------------------------------------------|---------------------|-----------------------------------|---------------------|--------------------------------------|------|
| N°23 | 88 | F | Hypertension, hyperthyroidism                 | No                  | Femoral neck fracture             | day 1 post-surgery  | LMWH, antibiotic prophylaxis, NSAIDS | none |
| N°24 | 92 | F | Hypertension, transient Ischemic Attack       | No                  | Femoral neck fracture             | No                  | LMWH, antibiotic prophylaxis, NSAIDS | none |
| N°25 | 76 | M | Hypertension, diabetes                        | No                  | Femoral fracture                  | day of surgery      | LMWH, antibiotic prophylaxis, NSAIDS | none |
| N°26 | 87 | F | Hypertension, hyperthyroidism, osteoporosis   | No                  | Femoral neck fracture             | day 4 post-surgery  | LMWH, antibiotic prophylaxis, NSAIDS | none |
| N°27 | 85 | F | /                                             | No                  | Femoral neck fracture             | No                  | LMWH, antibiotic prophylaxis, NSAIDS | none |
| N°28 | 85 | F | /                                             | No                  | Femoral neck fracture             | day 1 post-surgery  | LMWH, antibiotic prophylaxis, NSAIDS | none |
| N°29 | 87 | F | Osteoporosis, arthrosis, rheumatoid arthritis | No                  | Per-trochanteric femoral fracture | day 1 post-surgery  | LMWH, antibiotic prophylaxis, NSAIDS | none |
| N°30 | 53 | F | /                                             | No                  | Femoral neck fracture             | No                  | LMWH, antibiotic prophylaxis, NSAIDS | none |

COPD, chronic obstructive pulmonary disease. LMWH, Low molecular weight heparin. NSAIDS, Nonsteroidal anti-inflammatory drugs. CPAP, Continuous positive airway pressure. ICU, Intensive Care Unit.
